# Supplementary material for: Timing of Ice Retreat Determines Summer State of Zooplankton Community in the Ob Estuary (the Kara Sea, Siberian Arctic)
Source: MDPI journal article supplement (doi:10.3390/d15050674), 2023-05-16
Supplement: s1 [file s1]

Table S1. Biomass of the dominant mesozooplankton species (mg DW m<sup>-3</sup>) along the transect in July 2019

|                              | Station |      |      |       |       |       |       |       |        |      |        |      |
|------------------------------|---------|------|------|-------|-------|-------|-------|-------|--------|------|--------|------|
| Species                      | 6254    | 6248 | 6249 | 6250  | 6246  | 6256  | 6244  | 6242  | 6242 2 | 6241 | 6241 2 | 6240 |
| <i>Calanus glacialis</i>     | -       | -    | -    | -     | -     | -     | 0.32  | 6.08  | 8.00   | 2.40 | 8.32   | 0.00 |
| <i>Pseudocalanus spp.</i>    | -       | 0.08 | 0.05 | 8.00  | 4.48  | 10.00 | 5.44  | 6.72  | 8.16   | 0.96 | 3.04   | 2.72 |
| <i>Limnocalanus macrurus</i> | 2.72    | 0.32 | 1.80 | 0.96  | 0.96  | 11.00 | 19.04 | 4.00  | 2.56   | 0.32 | 1.44   | 0.00 |
| <i>Senecella siberica</i>    | 0.80    | 0.21 | 0.24 | 7.84  | 3.52  | -     | 0.00  | -     | -      | -    | -      | -    |
| <i>Jashnovia tolli</i>       | 0.03    | 0.38 | 0.21 | 5.30  | 3.20  | 2.00  | 1.12  | -     | -      | -    | -      | -    |
| <i>Drepanopus bungei</i>     | -       | -    | -    | 13.60 | 8.00  | 2.00  | -     | -     | -      | -    | -      | -    |
| <i>Cyclops spp.</i>          | 0.64    | 0.48 | 0.16 | -     | 0.00  | -     | -     | -     | -      | -    | -      | -    |
| <i>Parasagitta elegans</i>   | -       | 0.48 | 0.00 | -     | 0.00  | -     | 0.42  | 0.63  | 1.05   | 0.45 | 2.43   | 0.84 |
| Others                       | 0.27    | 0.29 | 0.90 | 1.00  | 0.50  | 1.00  | 8.48  | 2.72  | 2.24   | 1.92 | 1.60   | 3.04 |
| Total                        | 4.46    | 2.24 | 3.36 | 36.16 | 20.48 | 28.00 | 34.82 | 20.15 | 22.01  | 6.05 | 16.83  | 7.08 |

Table S2. Abundance of the dominant zooplankton species (ind m<sup>-3</sup>) along the transect in July 2019

| Species                      | Station |      |      |      |      |      |      |      |        |      |        |      |
|------------------------------|---------|------|------|------|------|------|------|------|--------|------|--------|------|
|                              | 6254    | 6248 | 6249 | 6250 | 6246 | 6256 | 6244 | 6242 | 6242 2 | 6241 | 6241 2 | 6240 |
| <i>Calanus glacialis</i>     | 1       | 1    | 1    | 1    | 1    | 20   | 25   | 97   | 130    | 41   | 139    | 2    |
| <i>Pseudocalanus</i> spp.    | 1       | 18   | 22   | 3010 | 1100 | 2958 | 1404 | 2497 | 2639   | 589  | 1716   | 585  |
| <i>Limnocalanus macrurus</i> | 204     | 18   | 74   | 15   | 33   | 150  | 474  | 246  | 47     | 25   | 22     | 2    |
| <i>Senecella siberica</i>    | 49      | 27   | 14   | 1402 | 414  | 1    | 1    | 1    | 1      | 1    | 1      | 1    |
| <i>Jashnovia tolli</i>       | 30      | 290  | 47   | 530  | 212  | 150  | 437  | 13   | 14     | 1    | 1      | 47   |
| <i>Drepanopus bungei</i>     | 4       | 57   | 34   | 2820 | 1132 | 228  | 189  | 6    | 28     | 2    | 1      | 1    |
| <i>Cyclops</i> spp.          | 40      | 27   | 9    | 4    | 1    | 1    | 1    | 1    | 1      | 1    | 1      | 1    |
| <i>Parasagitta elegans</i>   | 1       | 1    | 1    | 1    | 1    | 20   | 17   | 198  | 169    | 212  | 452    | 46   |

Table S3. Demographic structure (abundance of different copepodite stages, ind m<sup>-3</sup>) of populations of the dominant zooplankton species along the transect in July 2019.

| Species, developmental stage    | Station |      |      |      |      |      |      |        |      |      |
|---------------------------------|---------|------|------|------|------|------|------|--------|------|------|
|                                 | 6254    | 6249 | 6250 | 6246 | 6256 | 6244 | 6242 | 6242_2 | 6241 | 6240 |
| <i>Limnocalanus macrurus</i> CI | 143     | 49   | 89   | -    | 8    | 44   | 66   | 3      | 10   | 26   |
| <i>L.macurus</i> CII            | 31      | 4    | 14   | -    | 22   | 47   | 86   | 3      | 7    | 33   |
| <i>L.macurus</i> CIII           | 18      | 4    | 1    | -    | 22   | 109  | 41   | 7      | 6    | 37   |
| <i>L.macurus</i> CIV            | 11      | 5    | 11   | -    | 28   | 122  | 34   | 10     | 2    | 39   |
| <i>L.macurus</i> CV             | 1       | 10   | 13   | -    | 60   | 135  | 17   | 21     |      | 58   |
| <i>L.macurus</i> fem            | -       | 1    | -    | -    | 19   | 6    | -    | -      | -    | 13   |
| <i>L.macurus</i> male           | -       | 1    | -    | -    | 18   | 11   | -    | -      | -    | 15   |
| <i>Senecella siberica</i> CI    | 7       | 121  | 242  | 26   | 17   | 36   | -    | -      | -    | -    |
| <i>S.siberica</i> CII           | 14      | 226  | 511  | 31   | 43   | 47   | -    | -      | -    | -    |
| <i>S.siberica</i> CIII          | 28      | 66   | 143  | 75   | 62   | 75   | -    | -      | -    | -    |
| <i>S.siberica</i> CIV           | 1       | 1    | 1    | 80   | 29   | 276  | -    | -      | -    | -    |
| <i>S.siberica</i> CV            | -       | -    | -    | -    | 1    |      | -    | -      | -    | -    |
| <i>Jashnovia tolli</i> CI       | 7       | 5    | 35   | 26   | -    | 36   | -    | -      | -    | -    |
| <i>J.tolli</i> CII              | 14      | 5    | 65   | 31   | -    | 47   | -    | -      | -    | -    |

|                             |    |    |     |    |   |     |    |    |    |   |
|-----------------------------|----|----|-----|----|---|-----|----|----|----|---|
| <i>J.tolli</i> CIII         | 28 | 6  | 160 | 75 | - | 75  | -  | -  | -  | - |
| <i>J.tolli</i> CIV          | 1  | 31 | 94  | 80 | - | 276 | -  | -  | -  | - |
| <i>J.tolli</i> CV           | -  | -  | 2   | -  | - | -   |    |    |    | - |
| <i>Calanus glacialis</i> CI | -  | -  | -   | -  | - | -   | 18 | 21 | 11 | - |
| <i>C.glacialis</i> CII      | -  | -  | -   | -  | - | -   | 35 | 55 | 14 | - |
| <i>C.glacialis</i> CIII     | -  | -  | -   | -  | - | -   | 32 | 33 | 8  | - |
| <i>C.glacialis</i> CIV      | -  | -  | -   | -  | - | -   | 20 | 17 | 8  | - |
| <i>C.glacialis</i> CV       | -  | -  | -   | -  | - | -   | 1  | 3  |    | - |
| <i>C.glacialis</i> fem      | -  | -  | -   | -  | - | -   |    | 1  |    | - |
